# Supplementary material
Source: PubMed Central journal article supplement (PMC2291080)
Supplement: pnas_0705410105_6.pdf [file pnas_0705410105_6.pdf]

**A**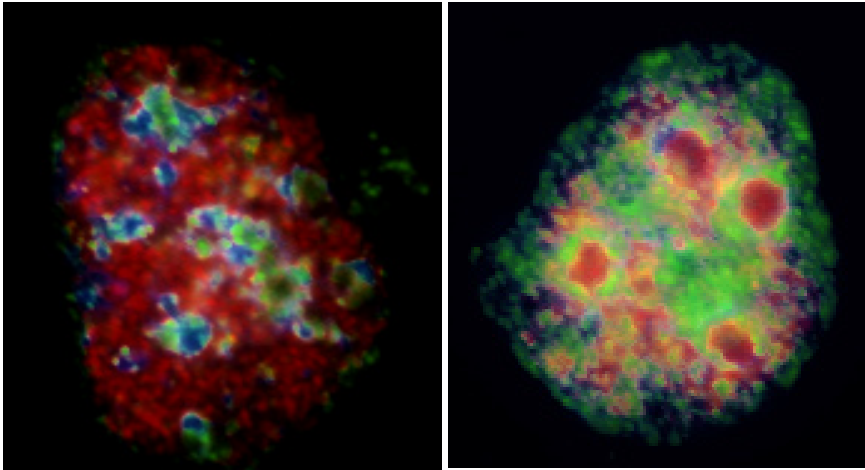

Merge:  
 Red: RFP  
 Green: BrdU  
 Blue: DNA

**RFP -Killin****B**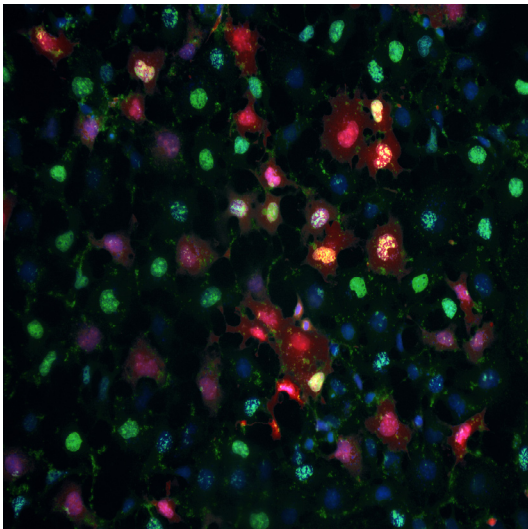**RFP Control**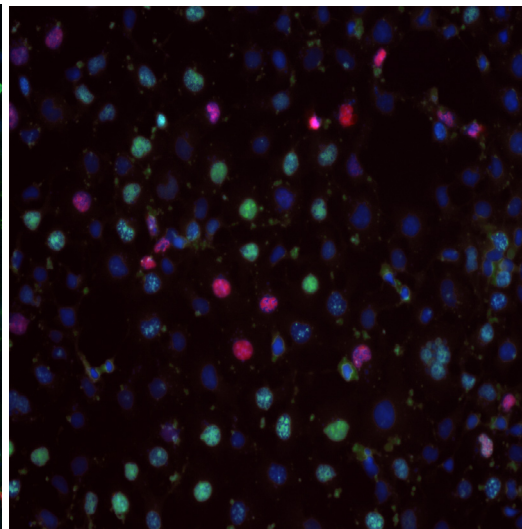**RFP -Killin**

Merge:  
 Red: RFP  
 Green: BrdU  
 Blue: DNA

| DAPI | BrdU | RFP | Both | Predicted | DAPI | BrdU | RFP-Killin | Both | Predicted |
|------|------|-----|------|-----------|------|------|------------|------|-----------|
| 100% | 25%  | 26% | 6.3% | 6.5%      | 100% | 26%  | 14%        | 0.7% | 3.6%      |
