# Supplementary material
Source: PubMed Central journal article supplement (PMC2291080)

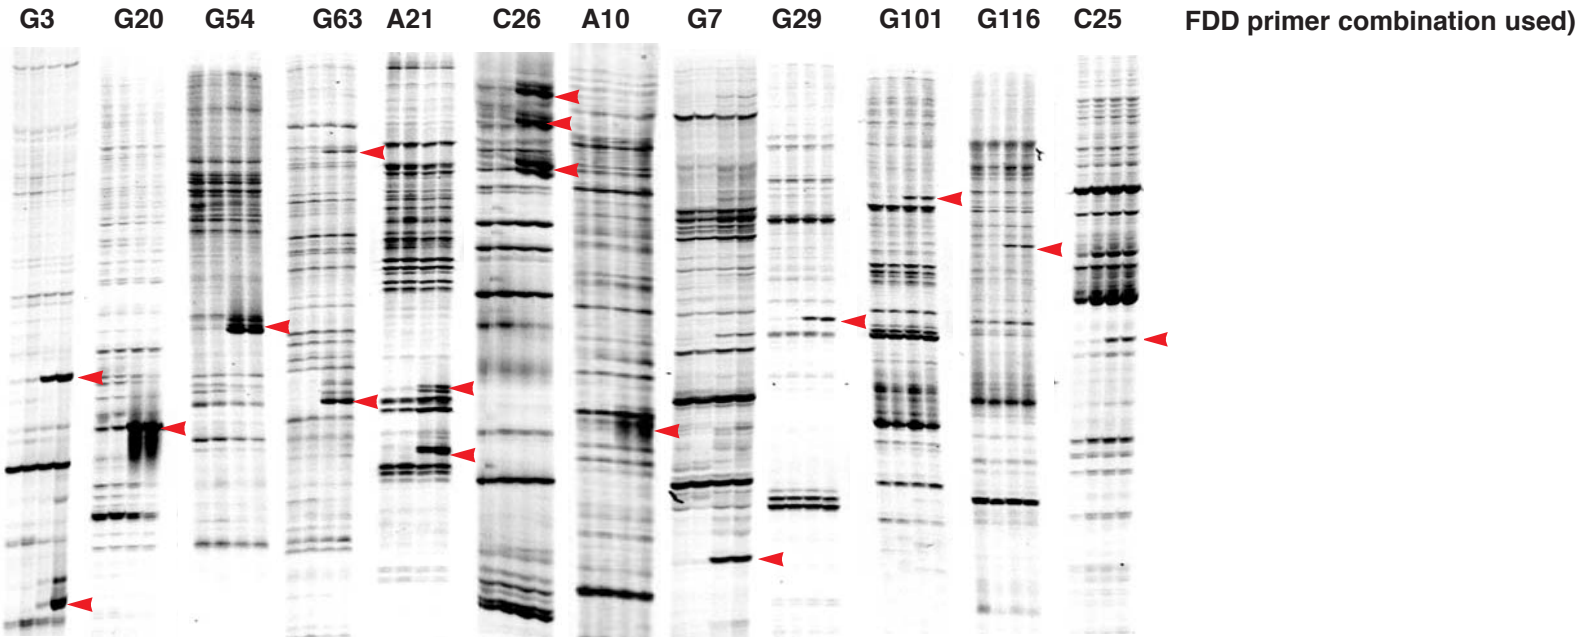

Supplement: pnas_0705410105_1.pdf [file pnas_0705410105_1.pdf]

**A****GFP-Killin**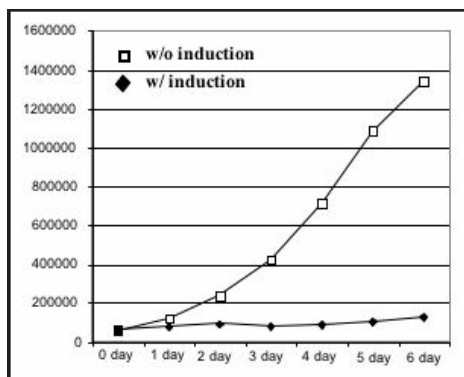**GFP**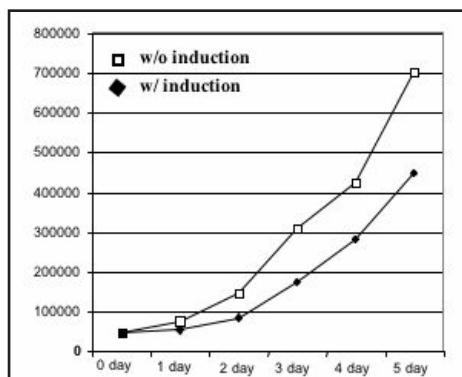**B**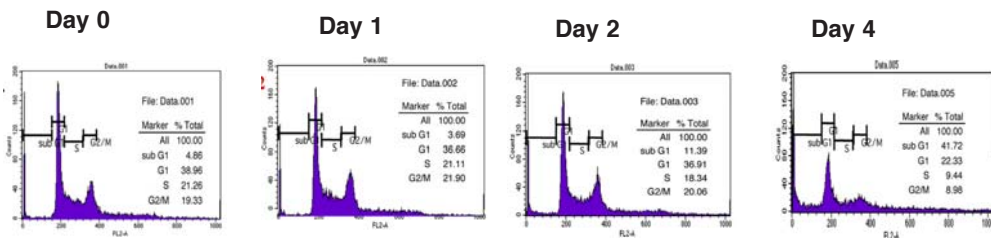**C**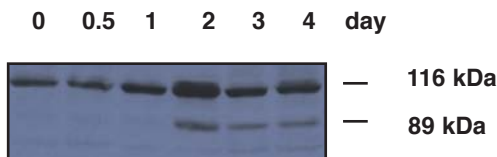

Supplement: pnas_0705410105_2.pdf [file pnas_0705410105_2.pdf]

0

1

2

3

4

Day

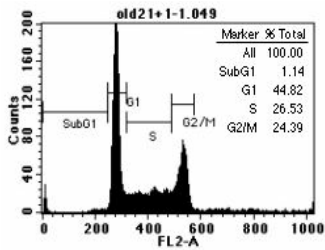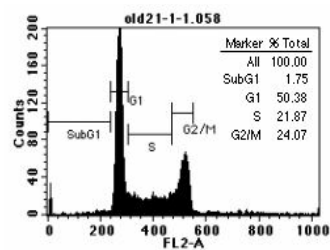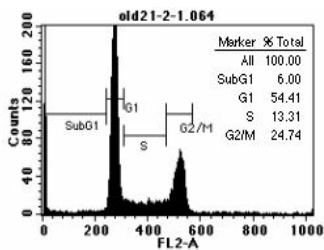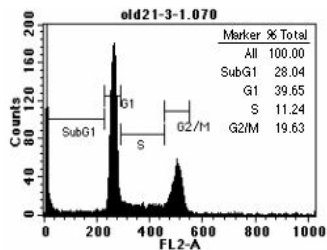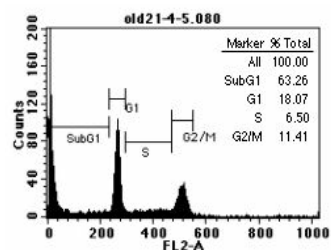

pSuper

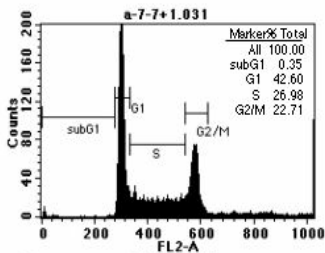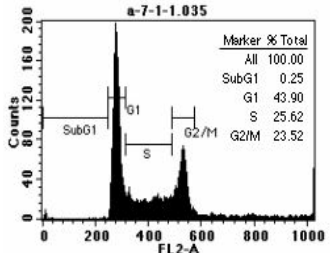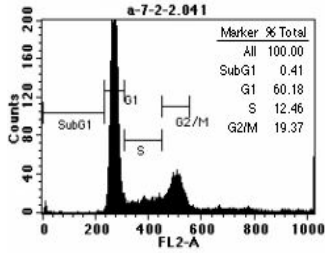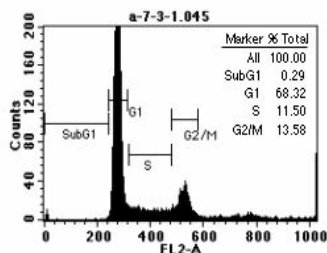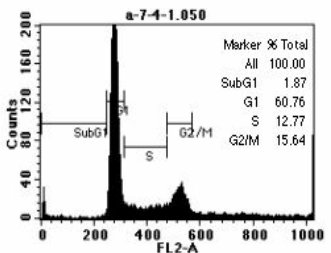pSuper  
-killin

Supplement: pnas_0705410105_3.pdf [file pnas_0705410105_3.pdf]

**A**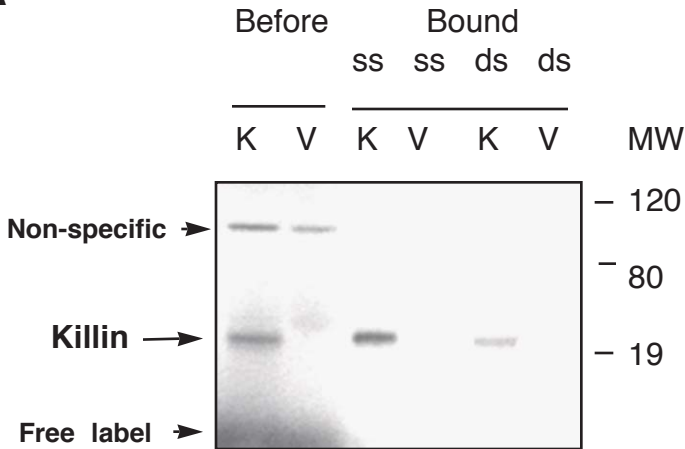

Supplement: pnas_0705410105_4.pdf [file pnas_0705410105_4.pdf]

$^{32}\text{P}$

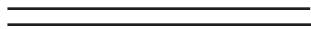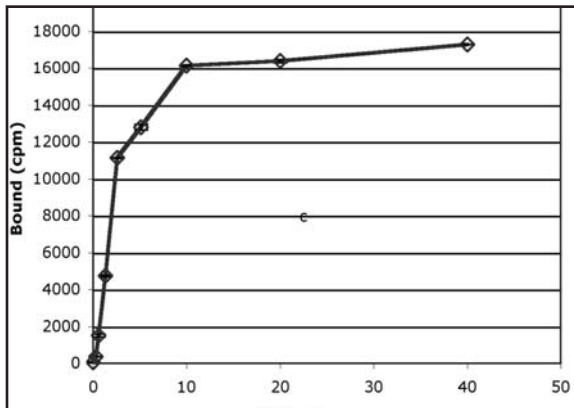

Killin/N8-50 ( $\mu\text{M}$ )

$^{32}\text{P}$

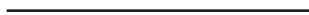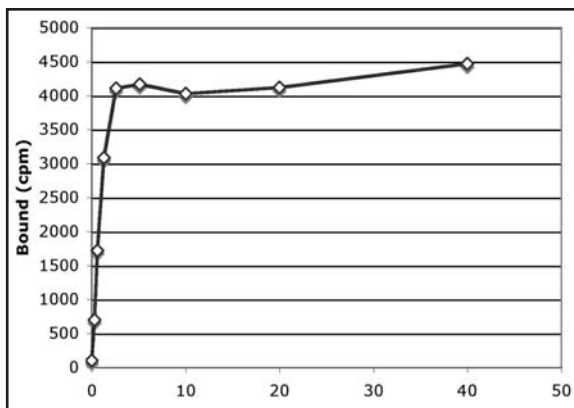

Killin/N8-50 ( $\mu\text{M}$ )

$^{32}\text{P}$

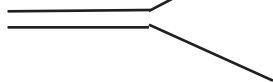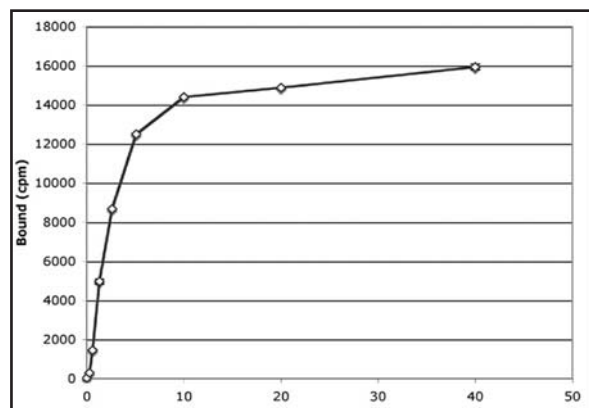

Killin/N8-50 ( $\mu\text{M}$ )

Supplement: pnas_0705410105_5.pdf [file pnas_0705410105_5.pdf]

12 24 12 24 Hour

+ + - - Tet

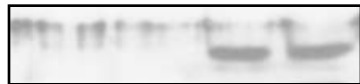

**GFP-Killin**

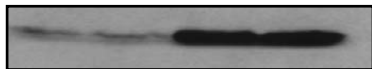

**Total Chk1**

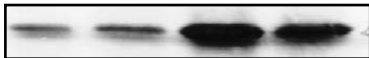

**Chk1-Ser317P**

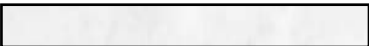

**Chk1-Ser345P**

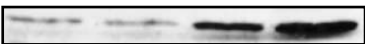

**Total Chk2**

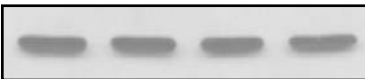

**Actin**

Supplement: pnas_0705410105_7.pdf [file pnas_0705410105_7.pdf]
